**1 Exon-based phylogenomics strengthens the phylogeny of Neotropical cichlids and**  
**2 identifies remaining conflicting clades (Cichlomorphae: Cichlidae: Cichlinae)**

**3**  
**4 Katriina L. Ilves<sup>1,2\*</sup>, Dax Torti<sup>3,4</sup>, and Hernán López-Fernández<sup>1</sup>**

**5** <sup>1</sup> Department of Natural History, Royal Ontario Museum, 100 Queen's Park, Toronto,  
**6** ON M5S 2C6 Canada

**7** <sup>2</sup> Current address: Biology Department, Pace University, 1 Pace Plaza, New York, NY  
**8** 10038

**9** <sup>3</sup> Donnelly Sequencing Center, University of Toronto, 160 College Street, Toronto, ON  
**10** M5S 3E1 Canada

**11** <sup>4</sup> Current address: Ontario Institute for Cancer Research, MaRS Center, 661 University  
**12** Avenue, Toronto, ON M5G 0A3 Canada

**13** \*Corresponding author at: Biology Department, Pace University, 1 Pace Plaza, New  
**14** York, NY 10038; email: [katriina.ilves@gmail.com](mailto:katriina.ilves@gmail.com)

**15**  
**16 Abstract**

**17** The phenotypic, geographic, and species diversity of cichlid fishes have made them a  
**18** group of great interest for studying evolutionary processes. Here we present a targeted-  
**19** exon next-generation sequencing approach for investigating the evolutionary  
**20** relationships of cichlid fishes (Cichlidae), with a particular focus on the Neotropical  
**21** subfamily Cichlinae using a set of 923 primarily single-copy exons designed through  
**22** mining of the Nile tilapia (*Oreochromis niloticus*) genome. Sequence capture and  
**23** assembly were robust, leading to a complete dataset of 415 exons for 139 species (147

terminals) that consisted of 128 Neotropical species, six African taxa, and five Indo-Malagasy cichlids. Gene and species trees were calculated using alternative partitioning schemes and reconstruction methods. In general, all methods yielded similar topologies to previously hypothesized relationships within the Cichlinae and clarified several relationships that were previously poorly supported or in conflict. Additional work will be needed to fully resolve all aspects of Cichlinae phylogeny. Overall, this approach yielded a well-resolved phylogeny of Neotropical cichlids that will be of utility for future assessments of the evolutionary and ecological processes within this diverse group of fishes. Furthermore, the general methodology employed here of exon targeting and capture should be applicable to any group of organisms with the availability of a reference genome.

## 1. Introduction

Neotropical cichlid fishes are rapidly becoming a model to understand the evolutionary history and biogeography of the exceptionally diverse Neotropical freshwater fish fauna (e.g. Hulsey and García de León 2005, 2006; López-Fernández et al. 2013; Arbour and López-Fernández 2014, 2016; McMahan et al. 2013; Říčan et al. 2013; Astudillo-Clavijo et al. 2015; Tagliacollo et al. 2015; Burrell 2016). Likewise, the emergence of Neotropical cichlids as models of adaptive diversification in riverine environments is starting to provide a meaningful complement to the long-established studies of adaptive radiation of lacustrine cichlids in Africa (e.g. Fryer and Iles 1972; Kocher 2004; Wagner et al. 2012; Brawand et al. 2014; Seehausen 2015). Nevertheless, continuing the evolutionary study of Neotropical cichlids depends on the availability of a

robust phylogenetic framework that allows reliable reconstruction of divergence times, supports comparative analysis of lineage and phenotype divergence, and clarifies our understanding of biogeographic history.

Numerous studies have addressed the intergeneric and higher level relationships of Neotropical cichlids or some of their clades, and a relatively clear phylogenetic structure for the subfamily has emerged over the last two decades (e.g. Kullander 1998, Farias et al. 1999, 2000; Hulsey et al. 2004; Concheiro-Pérez et al. 2007; Musilová et al. 2008, 2009; Smith et al. 2008; López-Fernández et al. 2010; Hulsey and Hollingsworth 2010; McMahan et al. 2013; Říčan et al. 2013, 2016). While these analyses have resulted in an increasingly stable understanding of Cichlinae relationships, a well-established taxonomy at the tribe level, and a relatively robust set of relationships among genera, a fully resolved and unambiguously supported phylogeny of Neotropical cichlids has yet to be achieved. This is particularly true of several basal relationships among genera or groups of genera within the three main tribes, Geophagini, Cichlasomatini and Heroini that remain poorly resolved or supported (e.g. López-Fernández et al. 2010; McMahan et al. 2013; Říčan et al. 2016).

Most analyses of Neotropical cichlid phylogeny have been based on relatively few loci (usually 10 or less) and often have been heavily informed by mitochondrial data (e.g. Říčan et al. 2008, Smith et al. 2008, López-Fernández et al. 2010, McMahan et al. 2013; Friedman et al. 2013). These studies are therefore limited in their ability to provide robust phylogenetic analyses, especially in the light of sequence saturation (e.g. Farias et al. 2001; López-Fernández et al. 2005), conflicting signal between nuclear and mitochondrial data (Dornburg et al. 2014; Říčan et al. 2016), and extensive basal short

branches that often receive poor statistical support (López-Fernández et al. 2005, 2010). Beyond these well-known limitations, the small size of these datasets does not allow the incorporation of species tree approaches to phylogenetic analyses, and thus, all these studies are susceptible to producing misleading relationships due to conflict between gene trees and species trees (e.g. Maddison 2007; Edwards 2009). A recent study by Říčan et al. (2016) attempted to circumvent some of these potential limitations by using a large dataset of concatenated Single Nucleotide Polymorphisms (SNPs) derived from Restriction Enzyme Associated DNA (ddRAD). They obtained a largely well-supported tree with the largest taxon sampling of Central American cichlids to date, but their analysis was not able to unambiguously resolve some relationships and was limited to only one clade within Cichlinae. Moreover, Říčan et al.'s (2016) dataset is not amenable to be analyzed under coalescent-based methods and therefore is not suitable to identify potential conflicts in phylogenetic relationships derived from the effects of deep coalescence (e.g. Edwards 2009, Heled and Drummond 2010).

This latter point is relevant because the Neotropical cichlid phylogeny is plagued by short basal branches that, in previous work, have been interpreted as evidence of rapid diversification (López-Fernández et al. 2005, 2010). Concordant with this interpretation, comparative studies are revealing patterns of rapid early lineage and phenotype diversification through habitat and diet-related morphological diversification (e.g. López-Fernández et al. 2013; Arbour and López-Fernández 2014.). These short branches, however, also represent a problem in phylogenetic reconstruction because rapid divergence can result in marked incongruence between gene divergence patterns and species divergence patterns due to population-level phenomena such as deep coalescence

(e.g. Kubatko and Degnan 2007; Edwards 2009). Traditional phylogenetic methods such as those generally used in Neotropical cichlid analyses assume that loci in the genome diverge in concert with the species-level divergence of their corresponding species and that the phylogenetic signal is additive across loci; however, it is widely understood that genes have their own phylogenetic histories (gene trees) and that those histories do not always coincide node-to-node with the phylogenetic history of evolving lineages (species trees) (e.g. Maddison 2007). These incongruences between gene trees and species trees can be caused by several mechanisms, including hybridization and introgression, but for phylogenetic purposes the most widespread and potentially problematic is incomplete lineage sorting (ILS) or deep coalescence (Edwards 2009). From a phylogenetic reconstruction point of view, the challenge is how to identify the signal of individual gene divergence that is congruent with species divergence (Heled & Drummond 2010). It has been repeatedly shown that concatenation of sequences from genes with incongruent gene trees can produce erroneous topologies with high statistical support (Edwards 2009, Heled & Drummond 2010, Mendes 2017). In the case of several Neotropical cichlid clades, short, poorly supported basal branches could result from poor sampling of that portion of the tree or represent times of divergence during which ILS resulted from fast species divergence. In the latter case, concatenated phylogenetic analyses would result in misleading topological reconstructions. Clearly separating these two scenarios, lack of data versus deep coalescence, may not be entirely possible, but the use of many independent nuclear loci (to increase gene tree sampling) and comparing concatenation methods and gene tree methods should help clarifying whether the pattern observed is due to a real evolutionary process or is the result of lack of data, improper analysis or

both. Until recently, both the availability of methods to analyze species trees and the technical difficulties associated with identifying and sequencing many nuclear loci made this type of analysis very difficult or plainly inaccessible. With the advent of massively parallel sequencing and the development of methods that allow reconstructing phylogenies using models based on the coalescent, it is now possible to re-evaluate the phylogeny of Neotropical cichlids using phylogenomic datasets of hundreds of loci along with methods that correct for the effects of ILS. Despite these promising developments, however, computational limitations still restrict the options available to analyze truly phylogenomic datasets (e.g. hundreds or thousands of loci) with relatively large numbers of terminals and explicit coalescent analyses of sequence alignments.

In this study we used massively parallel sequencing and a custom-designed exon target-capture toolkit (Ilves and López-Fernández 2014) to generate a phylogenomic analysis of Neotropical cichlids under both concatenation and summary coalescent approaches. The main goals of the study were to update currently available hypotheses of Cichlinae relationships with a much larger dataset than previously available, and to leverage the phylogenomic dataset to perform coalescent-based analyses that should account for the possible effects of incomplete lineage sorting on our ability to accurately reconstruct Cichlinae relationships.

## **2. Materials and Methods**

### *2.1. Taxon selection*

Selection of taxa aimed at including as many lineages of Neotropical cichlids as possible. Representatives of all recognized genera were included for all tribes except the

Heroini. A recent proliferation of new generic names for taxa in the clade has taxonomically separated several monophyletic lineages that were previously considered congeners (McMahan et al. 2015, Říčan et al. 2016). More importantly, many previously “orphan” clades variously referred to as ‘*Cichlasoma*’ *sensu lato* or ‘*Heros*’ have been formally assigned names. Given that these changes occurred after the dataset for this study was generated, representatives for some of these new genera are absent, but our dataset includes members of every clade within Heroini. Moreover, the study revises the identification of a few lineages of questionable identity in a previous analysis led by the senior author of this paper (López-Fernández et al. 2010, and see Říčan et al. 2013). Although those changes did not greatly affect the overall results of those analyses, they did incorporate additional uncertainty to the resolution of relationships within a clade of Heroini and, therefore, it is pertinent to correct them.

The dataset used herein closely resembles that of López-Fernández et al. (2010), and focuses on improving sampling of portions of the tree that were most problematic in that study in hopes of improving resolution and support for uncertain groupings such as those among the Cichlasomatini *Acaronia* and *Laetacara*, as well as some basal relationships among Geophagini and the heroin clade “amphilophines” *sensu* López-Fernández et al. (2010). Taxon sampling also was designed to test the depth of phylogenetic divergence that could be resolved using the targeted capture probes used in this study (and see Ilves and López-Fernández 2014). At the most recent variation end of the spectrum, we included two individuals of several species to test whether the dataset had enough phylogenetic signal to identify species as monophyletic. We also tested the ability of the dataset to resolve species-level relationships within genera by including a

comparatively large number of species within the large *Crenicichla-Teleocichla* clade of Geophagini.

Altogether, the dataset included 147 terminals representing 139 species. Of these, 128 were Neotropical species and six were African taxa, which represent the sister group of Cichlinae. These taxa include *Heterochromis multidentis*, the sister to all African cichlids, and both the reference sequence and a newly generated set of sequences for the Nile Tilapia, *Oreochromis niloticus*, the species from which the probes for target capture were developed (Ilves and López-Fernández 2014). Finally, we included five Indo-Malagasy cichlids which are sister to the African-Neotropical clade. The Sri Lankan cichlid *Pseudetroplus suratensis* was used as the outgroup in all analyses. *Pseudetroplus* and its sister genus, *Eetroplus*, are part of the Eetroplinae subfamily which forms the sister group to the rest of the family (e.g. Stiassny 1991, Sparks and Smith 2004, Sparks 2008, López-Fernández et al. 2010). The complete list of species, museum catalog numbers, accession numbers (when available) and general locality data are given in Appendix A.

## 2.2. Library preparation for exon capture and sequencing

DNA extraction procedures followed those from Ilves and López-Fernández (2014). Exon capture of 923 targets and sequencing was performed at the Donnelly Sequencing Centre (DSC) at the University of Toronto (<http://dsc.utoronto.ca/dsc/index.html>) led by D. Torti, using the probes and general protocol described in Ilves and López-Fernández (2014). A double-hybridization procedure of probes to templates was performed, as this was found to significantly increase yield in previous work (Ilves and López-Fernández 2014). Details about the



probe clean-up, library preparation, and exon capture procedure can be found in Appendix B. Paired-end sequencing was conducted on an Illumina HiSeq platform.

### *2.3. Automation of data processing and analysis*

Multiple custom scripts were used to automate data processing and analysis from the initial step of read quality control to the creation of maximum likelihood phylogenetic gene trees. An overview file that describes each step can be found in Appendix C and subsequent appendices contain the specific script files used to perform each particular task or set of tasks.

### *2.4. Sequence quality control, read assembly and consensus sequence generation*

The general procedures and parameters for the quality control of the sequencing reads, assembly of the reads into contigs, and generation of consensus sequences for each exon and species follow those from Ilves and López-Fernández (2014). A custom script was run that automated read quality control, contig assembly, and consensus sequence generation (Appendix D). Briefly, the standalone version of PRINSEQ (Schmieder and Edwards 2011) was used to retain only high-quality reads based on read length and base quality, bowtie2 version 2.1.0 (Langmead and Salzberg 2012) was used to map the contigs to a set of reference sequences from the Nile tilapia (*Oreochromis niloticus*) genome (Appendix E), and SAMtools version 0.1.19-44428cd (Li et al. 2009) was used to generate consensus sequences of the assembled contigs. Custom scripts were used to convert the FASTQ files to FASTA files for alignment (Appendix F) and convert all low quality base calls to “N” and trim terminal “N”s (Appendix G). FASTA sequences were

imported into Geneious version 7.1.8 (<http://www.geneious.com>, Kearse et al. 2012), from which only sequences with a minimum of 100 bp were exported for subsequent use in alignment and phylogenetic analyses.

## 2.5. Sequence alignment and gene tree and species tree phylogenetic analyses

A custom script was used to combine all sequences for each exon into a single file (Appendix H). Sequence alignment for each exon was performed with muscle version 3.8.31 (Edgar 2004) using default parameters and was automated using a custom script (Appendix I - MuscleAlignedScript\_144taxa\_X600\_q20\_d10\_100bp.txt). Each alignment was then manually inspected for quality and completeness in Geneious version 7.1.8 (<http://www.geneious.com>, Kearse et al. 2012). Only alignments that included a sequence of at least 100 bp for each taxon were retained for phylogenetic analyses. The 32 opsin exon alignments in the target kit were excluded from all analyses because they represent a family of genes for which duplication and pseudogenization events have been documented, complicating their use in phylogenetics due to paralogy (e.g. Bowmaker 2008, Weadick et al. 2012).

Coding and non-coding regions of each alignment were inferred from the annotated reference genome. Although the probes, as originally designed were intended to target exon-coding regions, analyses of early alignments during the design of the protocol revealed non-open reading frames for some sequences (see Ilves and López-Fernández 2014). Additionally, subsequent iterations of annotation in the Nile Tilapia genome revealed that some regions originally annotated as coding exonic regions actually corresponded to non-coding fragments. Coding and non-coding regions were identified

and correspondingly separated for analyses in this paper. Bootstrapped gene trees (1000 replicates) for each exon alignment were generated using RAxML version 8.0.10 (Stamatakis 2008) with a GTRGAMMA model and a corresponding partition file with the codon positions and non-coding regions of the exon. This procedure was automated with a custom script (Appendix J).

ASTRAL-II version 4.8.0 (Mirarab and Warnow 2015) and STAR (Liu et al. 2009) species tree methods with multi-locus bootstrapping (Seo 2008) were run on the resulting bootstrapped RAxML datasets. ASTRAL-II analyses with 500 bootstrap replicates were run locally on a desktop Apple® iMac whereas STAR analyses were run on the STRAW server (Shaw et al. 2013). Because ASTRAL analyses require a maximum likelihood (ML) tree for each gene in addition to the set of bootstrapped tree files, RAxML was used to conduct 40 ML searches on each exon alignment (custom script Appendix K). To assess possible conflicts between species-tree and total-evidence concatenated analyses, we also performed a Maximum Likelihood analysis of concatenated 415 loci in RAxML with one thousand bootstrap replicates.

## 2.6. Computing resources used:

Read quality control, mapping, contig assembly, consensus sequence generation, and sequence alignment and some individual gene alignment RAxML analyses were performed locally on a desktop Apple iMac (3.5 GHz Intel Quad Core i7 with 32GB RAM and 3TB hard drive). Some individual gene alignment RAxML analyses were performed on the GPC supercomputer at the SciNet HPC Consortium (Loken et al. 2010). SciNet is funded by the Canada Foundation for Innovation under the auspices of

Compute Canada, the Government of Ontario, Ontario Research Fund - Research Excellence, and the University of Toronto.

## 2.7. Data availability

Alignments for all exons with complete taxon representation of 100 bp or greater as well as all bootstrapped phylogenetic trees, will be available on Dryad and all other data files, including raw fastq files, are available from corresponding author K.L. Ilves, following publication.

## 3. Results

### 3.1. Target capture

923 exons are included in the probe set first developed by Ilves and López-Fernández (2014). 32 exons correspond to opsins, which were excluded from this study *a priori* due to their histories of gene duplication, which left a total of 891 exons as potential targets. Enforcing the restrictions of a complete dataset where every species must have a sequence of at least 100 bp, resulted in a dataset of 428 captured exons. 13 of these alignments were deemed to be ‘poor’ after visual inspection due to large blocks of ambiguous base pair calls (N) present in multiple species, often comprising over 50% of the total sequence length, thereby resulting in a dataset of 415 exons (~47% of target set) for phylogenetic analysis. Although the minimum sequence length was set at 100 bp, the average minimum sequence length relative to the average reference sequence length of 1136 bp was ~62% (SD 23%), indicating that most species had sequence for most of the

length of each target. The final dataset comprised 147 taxa representing 139 species for 415 exons with a total length of 471,448 bp.

### 3.2. Depth of phylogenetic resolution in the exon-capture dataset

Analyses of multiple individuals within a species consistently resulted in monophyly at the species level with unambiguous support, as revealed by the concatenated analyses (Appendix L). These results were consistent at various levels of divergence, ranging from resequencing of the African reference *Oreochromis niloticus* to newly sequenced Neotropical species in all major tribes (e.g. Geophagini: *Crenicichla sveni*, Cichlasomatini: *Krobia petitella*, Heroini: *Symphysodon aequifasciatus*). Both concatenated and consensus coalescence analyses of species-level divergence within genera also revealed a large phylogenetic signal that resulted in generally well-resolved and supported relationships among species within genera (e.g. *Crenicichla*). These results generally support the notion that the target capture probes used in this study are adequate to resolve phylogenetic relationships within Cichlidae spanning family to species levels of divergence.

### 3.3. Phylogenetic analyses

All analyses, regardless of methods, recovered the expected monophyletic Neotropical subfamily Cichlinae as sister to a monophyletic African Pseudocrenilabrinae, both of which in turn are sister to a paraphyletic arrangement of Indian and Malagasy lineages in the subfamilies Etroplinae and Ptychochrominae (Fig. 1). These relationships have long been well established through numerous studies of molecular and

morphological datasets and will not be discussed further (Stiassny 1991, Sparks 2004, 2008, Smith et al. 2008, López-Fernández et al. 2010, McMahan et al. 2013, Friedman et al. 2013, Matschiner et al. 2016). Relationships among the seven recognized tribes of Neotropical cichlids (Cichlini, Retroculini, Astronotini, Chaetobranchini, Geophagini, Cichlasomatini and Heroini), were likewise recovered unambiguously across analyses. Results herein coincide with previous work in placing the Retroculini and Cichlini clade as sister to the remainder of Cichlinae. The tribes Cichlasomatini and Heroini form a monophyletic clade sister to a clade formed by Astronotini, Chaetobranchini and Geophagini. Interestingly, all analyses recovered Astronotini (genus *Astronotus*) as sister to the Chaetobranchini plus Geophagini clade. This relationship was also found by Matschiner et al. (2016), but has not been universally recovered in previous analyses: Smith et al. (2008) found *Astronotus* as sister to all Cichlinae except Cichlini and Retroculini, López-Fernández et al. (2010) found it as sister to the Cichlasomatini and Heroini clade, and McMahan et al. (2013) recovered the genus as sister to a clade of Chaetobranchini and Geophagini. All these studies were based on a limited set of genes and a large amount of mitochondrial data, suggesting that the much larger dataset used herein resolves the previously unstable placement of the Astronotini.

In general, intergeneric relationships within each of the main Neotropical tribes, -- Geophagini, Cichlasomatini and Heroini--, were recovered with unambiguous support. Nevertheless, considerable ambiguity was observed across methods in the placement of some lineages within these tribes (see Fig. 1). Given the widespread similarity among topologies, for the remainder of the paper we use the ASTRAL-II coalescent species-tree (Fig. 1) as a reference because of the superior performance of Astral-II as a tool for

generating coalescent-based consensus species trees from gene trees (e.g. Arcila et al. 2016). Nevertheless, disagreements between this topology and those derived from the STAR species-tree method and the concatenated super-matrix topology are highlighted when pertinent (Fig. 2). Later we discuss the potential impact of topological uncertainty on macroevolutionary analyses and historical biogeographic studies of Neotropical cichlids.

All analyses coincide in placing the South American lineages as a paraphyletic arrangement at the base of Heroini, with the genus *Pterophyllum* as the earliest diverging lineage, followed by a clade of *Hoplarchus* and *Hypselecara* and then by a clade in which *Mesonauta* is sister to *Heros*, which is in turn sister to *Symphysodon* and *Uaru*. A similar arrangement has been found by other studies (e.g. McMahan et al. 2013), but the position of *Pterophyllum* can be flipped with that of *Hypselecara* and *Hoplarchus* clade (e.g. López-Fernández et al. 2010). Likewise, all analyses resulted in less than complete support for the position of *Heros*, but the placement does not vary across trees in this study. Support for the placement of *Heros* in previous studies (e.g. López-Fernández et al. 2010) was relatively weak, and despite orders of magnitude increase in the number of loci used herein, the phylogenomic analyses still result in less than 100% bootstrap support for the position of the genus. Contrastingly, the current analyses removed all ambiguity from the previously uncertain placement of the genus *Uaru* (López-Fernández et al. 2010).

As in previous studies, the remainder of Heroini is comprised by a geographically non-monophyletic arrangement of South and Central American lineages. Among these, a clade including the genera *Rocio*, *Tomocichla*, *Herotilapia* and *Astatheros* is sister to the

rest of Heroini. This arrangement is equivalent to and in the same position of the  
astatheroines clade sensu Říčan et al. (2016), but it does not include their newly  
described genus *Cribroheros*, which was not represented in our dataset. Říčan et al.  
(2016) recently split *Astatheros* sensu López-Fernández et al.'s (2010) into *Astatheros*,  
*Rocio* and *Cribroheros*, but phylogenetically there is no incongruence among the groups  
in both studies. The astatheroine clade is sequentially followed by the genus  
*Australoheros* as sister to all other heroins, an arrangement identical with that found by  
Říčan et al.'s (2016) analysis based on concatenated single nucleotide polymorphisms  
from a restriction site associated DNA (RAD) dataset. This result differs from that of  
López-Fernández et al. 2010 because the only species of *Australoheros* in that study was  
inadvertently switched with that of the unrelated *Cryptoheros nanoluteus* (see Appendix  
A for details, and Říčan et al. 2013). McMahan et al. (2013) also find a different  
placement for *Australoheros*.

Our analyses unambiguously find a monophyletic clade of purely Central  
American taxa that corresponds with the amphilophines of Říčan et al. (2016), even  
though our analysis did not include their genera *Cryptoheros*, *Talamancaheros* and  
*Isthmoheros*. Despite this correspondence, however, our analyses produced different  
internal relationships among the included genera. For example, while Říčan et al. found  
*Parachromis* in a subclade with *Amatitlania*, we find it in a different subclade that  
includes *Amphilophus* (Fig. 1). Likewise, our grouping corresponds roughly with the  
amphilophines of López-Fernández et al. 2010, but excludes *Trichromis* ('*Cichlasoma*'  
*salvini* in their Fig. 1). Even though the results of our phylogenomic analyses have  
stronger statistical support than those of López-Fernández et al. (2010) and of Říčan et al.



(2016, see their Fig. 5), the amphilophine clade found herein contains the largest number of weakly supported nodes in our analyses. It is interesting to note that, among amphilophines, the sequential position of *Petenia* and *Chortiheros* as sister to a clade of *Amatitlania*, *Hypsophrys* and *Neetroplus* was consistently recovered in all analyses, but support for this arrangement was ambiguous (Fig. 1, Appendices L & M). Říčan et al. (2016) recovered these two genera as sister to each other, but none of our analyses supported that relationship.

The largest disagreement among topologies obtained in this study, as well as with those from previously published analyses, involves the genera in the informal clade herichthyines, the Caribbean genus *Nandopsis*, and the caquetaines clade containing the genera *Caquetaia*, *Heroina* and the newly named genus *Kronoheros* (Fig. 2A). The relationship between these lineages and the amphilophines also varies among our three analyses, and often differs from relationships found in other studies. It is interesting that our concatenated and STAR coalescent analyses are more similar with each other than either is to the ASTRAL-II topology. In Říčan et al.'s (2016) analysis, the caquetaines were sister to a clade of amphilophines and herichthyins with *Nandopsis* sister to the latter. This is a similar arrangement to that found in our STAR and concatenated analyses, but in our ASTRAL-II topology (Fig. 2A) *Nandopsis* was sister to amphilophines, and in turn, the two were sister to the caquetaines. In all analyses, at least some of these relationships are inconclusively supported, although the concatenated analysis obtained the highest bootstrap values of the three. In Říčan et al.'s (2016) analysis, *Chiapaheros* remained in a polytomy. In our analysis, it is part of a well-supported clade along with two other well-supported clades: *Thorichthys* and *Trichromis*

and a clade comprising *Herichthys*, *Vieja*, *Wajpamheros*, *Chuco* and *Theraps*, but the relationships among these three lineages remains unclear (Fig. 2A).

Relationships among Geophagini in all analyses were generally compatible with those previously described by López-Fernández et al. (2012) and comprised by two major clades compatible with those described by López-Fernández et al. (2010, 2012). In the first of these, a clade of *Guianacara* and *Mazarunia* is sister to a clade of “apistogrammines” and “crenicichlines” sensu López-Fernández et al. (2010). Except for a few nodes within the *Crenicichla*-*Teleocichla* group and another one within *Mazarunia*, relationships within this large clade are largely congruent with previous results and well supported. Additionally, the sister relationship between *Acarichthys* and *Biotodoma* was unambiguously recovered, but support of its sister relationship to *Crenicichla* was always below 100%.

A second clade of Geophagini comprised the genus *Biotodoma*, the “geophagines”, “mikrogeophagines” and “crenicaratines” of López-Fernández et al. (2010). Monophyly of the “geophagines” (genera *Geophagus*, *Gymnogeophagus* and the ‘*Geophagus*’ *steindachneri* group) was unambiguously supported by all analyses, but relationships within the group were different in the three topologies (Fig. 2B). Moreover, the relative position of the genus *Biotodoma* and the “mikrogeophagines” (genera *Mikrogeophagus* and ‘*Geophagus*’ *brasiliensis*) was different in the coalescent-based analyses compared to the concatenated topology. As discussed below, ambiguity in the placement of the “geophagines” genera could have implications for estimating the age of cichlids.

Relationships within Cichlasomatini were generally identical among analyses. In all cases, a clade including *Nannacara*, *Ivanacara* and *Cleithracara* was recovered as the unambiguously supported sister group to the rest of Cichlasomatini. This clade is equivalent to the “nannacarines” sensu López-Fernández et al. (2010), but its position with respect to the rest of the tribe is novel with respect to previous studies. Musilová et al. (2009) found the “nannacarines” as sister to *Laetacara* but with low support, and López-Fernández et al. (2010) found it as sister to a clade of *Laetacara*, *Acaronia* and their “andinoacarines”, but also with low support. The genera *Cichlasoma* and *Aequidens* were found as sister to *Krobia* in all studies and as expected from previous work (Musilová et al. 2009, López-Fernández et al. 2010). Our analyses also unambiguously recovered a well-supported monophyly of *Andinoacara* and *Bujurquina* which in turn are sister to *Tahuantinsuyoa*. *Acaronia* and *Laetacara* were recovered as sister to the “andinoacarines” but the relative placement of the genera with respect to each other was not unambiguously supported in any of the analyses. Placement of these two genera has varied across studies: Musilová et al. (2009) found *Acaronia* to be sister to all Cichlasomatini, with *Laetacara* either sister to the remainder of the tribe or to the *Cichlasoma*, *Aequidens* and *Krobia* clade; López-Fernández et al. (2010) recovered a weakly supported sister clade that in turn was sister to “andinoacarines”, but support was low.

#### 4. Discussion

Even though higher-level relationships among clades and genera of Neotropical cichlids have become increasingly resolved and supported by recent work, the position of

several groups remains uncertain or weakly supported. In this study, we used a recently developed set of exon-targeting probes and massive parallel next generation sequencing to generate a large dataset aimed at resolving Cichlinae relationships that remain poorly supported. Our phylogenomic analyses confirm many relationships previously found among Neotropical cichlids, and provide unprecedented resolution and support for many relationships that were previously weakly supported, especially near the base of the tree. This is particularly true among some genera of Central American lineages in the amphiphines clade, the unambiguous clarification of the relationship among Geophagini clades crenicichlines, apistogrammines and guianacarines (sensu López-Fernández et al. 2010), and the strongly supported position of the Cichlasomatini clade nannacarines as the sister group to the rest of the tribe (Fig. 1 and see Appendices L & M). Nevertheless, despite an increase of two orders of magnitude in data when compared with other sequencing studies (e.g. López-Fernández et al. 2010; Říčan et al. 2013), some relationships remain unclearly established or poorly supported. The three main regions of the tree that continue to resist clear resolution include the Central American herichthyines, the position of the Cichlasomatini genera *Laetacara* and *Acaronia*, and the order of divergence among genera in the Geophagini clade including *Geophagus*, *Gymnogeophagus* and the '*Geophagus*' *steindachneri* clade (Fig. 2).

Previous studies have repeatedly found that Neotropical cichlids diversified over a relatively short time period, as evidenced by short branches and frequently weakly supported relationships near the base of the tree (e.g. Farias et al. 1999, López-Fernández et al. 2005, 2010). Most of the previously unresolved or weakly supported relationships in the López-Fernández et al. (2010) study, which has the most comparable taxon

sampling to this study, are resolved with unambiguous support by the phylogenomic analyses presented here regardless of the method used (compare Fig. 1 of both studies). Thus, in combination, the generalized stability of higher-level phylogenetic hypotheses obtained through both summary coalescent and concatenation methods in our analyses, suggests that conflict between gene trees and the species tree is relatively rare among Neotropical cichlids. It appears that incomplete lineage sorting and other sources of misleading phylogenetic signal, such as introgression or hybridization, do not frequently disrupt our ability to reconstruct relationships. We make this assertion with caution, however, because detailed phylogeographic studies of Neotropical cichlids have shown that at least some taxa may be affected by these problems, particularly at more recent levels of divergence (e.g. Willis et al. 2013, 2017). Even more germane to our study, the persistence of unresolved or poorly supported “deep” relationships within a few clades of Cichlinae may indicate a role for deep coalescence or other confounding effects in some early events of divergence among Neotropical cichlids (Fig. 2).

This point is particularly relevant because the tribes containing the remaining unresolved or conflictive clades underwent relatively quick adaptive diversification giving origin to a variety of lineages (López-Fernández et al. 2013, Arbour and López-Fernández 2014). It is suggestive that the largest remaining conflicts within the tree involve the Central American herichthyines, including some South American genera with South American distribution and the Caribbean genus *Nandopsis* (Fig. 2A). Recent work has shown that invasion of Central America by the tribe Heroini provided renewed ecological opportunity that allowed this clade to rapidly diversify into a broad variety of ecologically specialized forms (Arbour and López-Fernández 2016). It is conceivable that

such rapid adaptive divergence produced incomplete lineage sorting among some heroine lineages, resulting in reduced phylogenetic resolution (e.g. Kubatko and Degnan 2007, Edwards 2009). In fact, the early radiation of the Neotropical cichlid tribes in South America has been similarly shown to have occurred quickly, potentially leaving a similarly conflictive gene tree divergence patterns in other regions of the tree, particularly within Geophagini, which dominates the lineage and functional diversity of South American Neotropical cichlids (López-Fernández et al. 2013, Arbour and López-Fernández 2014, Astudillo-Clavijo et al. 2015). Even if early adaptive radiation in Neotropical cichlids resulted in incomplete lineage sorting in some clades, our results suggest that its effects may not be extensive because, with the exceptions pointed out above, both our concatenated and coalescent analyses recover largely congruent phylogenies. Moreover, most of the relationships recovered herein are congruent with those found in most previous studies based on much smaller, concatenated datasets (e.g. Říčan et al. 2008, Musilová et al. 2009, López-Fernández et al. 2010, McMahan et al. 2013) and with the ddRAD-based analysis of Central American heroines of Říčan et al. (2016).

The ability to generate a reliable phylogeny has important consequences beyond the mere systematic applications of the study. Uncertainty about the order of divergence and relationships among genera and higher clades can affect our ability to reconstruct the history of evolutionary divergence in cichlids. Three types of studies could be affected by diminishing but still present uncertainty in Neotropical cichlid relationships. Robust topologies are critical for using the fossil record to calibrate molecular phylogenies and reconstruct the timeline of diversification of a clade. The fossil record of cichlids is

relatively scarce, and considerable debate has ensued regarding the identity and placement of fossils, particularly the recently described Eocene fossils from the Lumbrera formation in Argentina (e.g. Malabarba et al. 2010, 2014, Friedman et al. 2013, López-Fernández et al. 2013). On the one hand, the strong support received by most nodes in our analyses should provide a solid scaffold for time calibration. Unfortunately, one of the most unstable relationships, that involving the geophagine genera *Gymnogeophagus*, *Geophagus* and '*Geophagus*' *steindachneri*, affects the certainty with which the Eocene fossil †*Gymnogeophagus eocenicus* can be placed on the tree. As can be gleaned from Fig. 2B, the position of *Gymnogeophagus* and its putative fossil taxon in the phylogeny is unstable. As a consequence, calibration of *Gymnogeophagus* remains uncertain because it is unclear whether *Gymnogeophagus* is sister to the broadly distributed *Geophagus* sensu stricto or to the northern Andes clade including '*Geophagus*' *steindachneri* (Fig. 2B). Therefore, the inconclusively established position of a fossil-bearing clade can have important consequences in both reconstruction of the timeline of divergence and the historical biogeography of South American cichlids.

From a biogeographic point of view, the uncertainty observed among Central American cichlids is likely to have even more dramatic consequences. The incongruent placement of the Caribbean genus *Nandopsis* and of the South American caquetaines limits our ability to accurately recreate the history of heroine invasion of Central America and for understanding the events driving the potential recolonization of South America by some of the Mesoamerican lineages such as *Mesoheros* and the caquetaines. Recent studies that have addressed the historical biogeography of Central American cichlids and their relationships to South America have relied on single reconstructions of the

phylogeny relying on either a small number of concatenated loci (e.g. Říčan et al. 2013, Tagliacollo et al. 2015) or on phylogenomic approaches based on concatenation of single nucleotide polymorphisms (Říčan et al. 2016). These studies focus on interpretations of the particular trees found in each of their analyses, but our analyses suggest that the historical biogeography of Central America may require either a more exhaustive analysis of phylogenetic relationships or the reconstruction of competing, alternative scenarios that reflect the current uncertainty in the phylogeny. Based purely on methodological arguments of performance and accuracy (e.g. Mirarab and Warnow 2015, Arcila et al. 2017), it is possible that our ASTRAL-II topology provides a more stable framework for analysis, but the weak support received by nodes in that arrangement suggest that any interpretations of historical biogeography should be done cautiously.

Phylogenies are also becoming increasingly important as the framework to perform macroevolutionary analyses of lineage and phenotypic divergence. With a proliferation of comparative methods and the increased availability of well supported and increasingly better dated trees, our ability to infer patterns and process of divergence continues to improve. With several studies recently addressing the evolution of Neotropical cichlids (e.g. Hulsey 2006, López-Fernández et al. 2013, Arbour and López-Fernández 2013, 2014, 2016, Astudillo-Cavijo et al. 2015, Burress 2016), it is pertinent to ask whether changes in the topology may require modification of our emerging understanding of Cichlinae macroevolution. The phylogeny obtained herein is remarkably similar to the López-Fernández et al. (2010) tree used in most of the macroevolutionary analyses listed above. When analyses are performed on a sample of the posterior distribution of the dated phylogeny and not just on the Maximum Clade



Credibility (MCC) tree, topological uncertainty should be reflected in the results such that observed macroevolutionary patterns should be robust to moderate topological changes. This should be particularly true for analyses of phenotypic divergence based on the construction of morphospaces, such as disparity through time and adaptive landscape inferences (e.g. Ingram and Mahler 2013, Slater and Pennel 2014). Likely more sensitive to changes in the tree are lineage through time and rate analyses because they depend on branch lengths in ultrametric trees, which in turn depend on the accuracy of both the topology and of age estimates. Because coalescent summary analyses such as ASTRAL-II and STAR do not provide branch lengths, the species trees estimated here cannot be used directly in comparative analyses that require ultrametric topologies derived from estimates of absolute time.

Finally, generating an ultrametric topology by dating phylogenomic datasets remains a challenge. In principle, there is no reason that phylogenomic species-tree hypotheses cannot be dated, but in practice it is not clear if the incorporation of large phylogenomic datasets and fossil data into actual analyses is computationally feasible (e.g. Bouckaert et al. 2014, Matschiner et al. 2016). Moreover, among other problems, traditional node dating methods require a priori placement of fossils on topologies, further complicating the use of fossils in unresolved clades, such as *†Gymnogeophagus eocenicus*. Alternatively, emerging total evidence dating methods that simultaneously generate phylogenies and age estimates combining molecular, morphological and fossil data may provide more flexibility and accuracy *vis a vis* uncertainty in the molecular phylogenies (e.g. Heath et al. 2014). Whether these methods can be employed in truly

phylogenomic contexts with hundreds of loci and taxa is not yet clear (e.g. Ronquist et al. 2012, Gavryushkina et al. 2016).

## 5. Conclusion

Phylogenomic analyses of Neotropical cichlids (subfamily Cichlinae) using 415 exons for 139 species in both concatenated and summary statistic coalescent frameworks resulted in generally well-resolved, strongly-supported and broadly-congruent topologies. The topologies obtained are similar to previous hypotheses of relationships among Cichlinae but, in general, provide stronger support for many relationships that previously had weak or conflicting support. The results of our analyses also suggest that the targeted genomic regions contain phylogenetic signal capable of resolving relationships at all levels of divergence within the clade. Nevertheless, we identified several regions of the tree in which relatively early divergence events cannot be reconstructed with certainty because different methods provide conflicting results, none of them with conclusive support. We suggest this incongruence may result from incompletely lineage sorting associated with the early adaptive divergence of the clades in which incongruence is observed. We argue that, despite some disagreements in the placement of these lineages both in this study and in previous analyses, most studies provide a broadly common signal of evolutionary relationships among Neotropical cichlids. A generally better supported phylogeny derived from our phylogenomic analyses should continue to provide a solid framework for the evolutionary analysis of lineage and phenotypic divergence in Neotropical cichlids. Future work will focus in further clarifying relationships within the few recalcitrant clades identified herein, and in leveraging the current dataset as a

uniquely strong molecular framework for clarifying the timeline of evolutionary  
divergence among Neotropical cichlids.

## Acknowledgements

The authors are grateful to M. Burrridge, M. Zur and E. Holm (Royal Ontario Museum [ROM]), M. Stiassny and B. Brown (American Museum of Natural History, New York), M. Sabaj (Academy of Natural Sciences of Drexel University, Philadelphia), R. Rodiles-Hernández (ECOSUR), L.R. Malabarba (Universidade Federal do Rio Grande do Sul, Porro Alegre, Brazil), J. Armbruster (Auburn University Museum, Auburn, Alabama) and Yves Fermon (Muséum National d'Histoire Naturelle, Paris) for curatorial assistance and the loan of tissue samples not available at the ROM collection. We are grateful to the people who assisted during fieldwork related to this work: J.H. Arbour, D. Bloom, R.R. Hernández, F.E. Hauser, N.K. Lujan, N. Meliciano, E.A. Liverpool, C.G. Montaña, G. Ortí, S. Refvik, M. A.P. Röepke, Soria, D.C. Taphorn, M. Tobler, S. C. Willis, K.O. Winemiller, Funding for this work, including fieldwork and laboratory analyses was provided by a Discovery Grant from the Natural Sciences and Engineering Research Council of Canada, ROM Governors and the National Geographic Society grants to HLF. Additional fieldwork was supported by a Coypu Foundation Grant to N.K. Lujan and ROM Trust Funds through HLF. KLI was supported by a Rebanks Postdoctoral Fellowship from the ROM Governors granted to HLF to develop a phylogenomic toolkit for the phylogenetic analysis of cichlids.

## References

619 Arbour JH, López-Fernández H. 2014. Adaptive landscape and functional diversity of  
620 Neotropical cichlids: implications for the ecology and evolution of Cichlinae  
621 (Cichlidae; Cichliformes). *J Evol Biol* 27:2431–42. doi: 10.1111/jeb.12486

622 Arbour JH, López-Fernández H. 2016. Continental cichlid radiations: functional diversity  
623 reveals the role of changing ecological opportunity in the Neotropics. *Proc R Soc*  
624 *B Biol Sci* 283:20160556. doi: 10.1098/rspb.2016.0556

625 Arcila D, Ortí G, Vari R, Armbruster JW, Stiassny MLJ, Ko KD, Sabaj MH, Lundberg J,  
626 Revell LJ, Betancur-R. R, Much. 2017. Genome-wide interrogation advances  
627 resolution of recalcitrant groups in the Tree of Life. *Nat Ecol Evol*. doi:  
628 10.1038/s41559-016-0020

629 Bouckaert R, Heled J, Kühnert D, Vaughan T, Wu CH, Xie D, Suchard M a., Rambaut  
630 A, Drummond AJ. 2014. BEAST 2: A Software Platform for Bayesian  
631 Evolutionary Analysis. *PLoS Comput Biol* 10:1–6. doi:  
632 10.1371/journal.pcbi.1003537

633 Bowmaker JK. 2008. Evolution of vertebrate visual pigments. *Vision Res* 48:2022–41.  
634 doi: 10.1016/j.visres.2008.03.025

635 Brawand D, Wagner CE, Li YI, Malinsky M, Keller I, Fan S, Simakov O, Ng AY, Lim  
636 ZW, Bezault E, Turner-Maier J, Johnson J, Alcazar R, Noh HJ, Russell P, Aken  
637 B, Alföldi J, Amemiya C, Azzouzi N, Baroiller J-F, Barloy-Hubler F, Berlin A,  
638 Bloomquist R, Carleton KL, Conte M a., D’Cotta H, Eshel O, Gaffney L, Galibert  
639 F, Gante HF, Gnerre S, Greuter L, Guyon R, Haddad NS, Haerty W, Harris RM,  
640 Hofmann H a., Hourlier T, Hulata G, Jaffe DB, Lara M, Lee AP, MacCallum I,  
641 Mwaiko S, Nikaido M, Nishihara H, Ozouf-Costaz C, Penman DJ, Przybylski D,

642 Rakotomanga M, Renn SCP, Ribeiro FJ, Ron M, Salzburger W, Sanchez-Pulido  
643 L, Santos ME, Searle S, Sharpe T, Swofford R, Tan FJ, Williams L, Young S, Yin  
644 S, Okada N, Kocher TD, Miska E a., Lander ES, Venkatesh B, Fernald RD,  
645 Meyer A, Ponting CP, Streelman JT, Lindblad-Toh K, Seehausen O, Di Palma F.  
646 2014. The genomic substrate for adaptive radiation in African cichlid fish. *Nature*  
647 513:375–381. doi: 10.1038/nature13726

648 Dornburg A, Townsend JP, Friedman M, Near TJ. 2014. Phylogenetic informativeness  
649 reconciles ray-finned fish molecular divergence times. *BMC Evol Biol* 14:169.  
650 doi: 10.1186/s12862-014-0169-0

651 Edwards SV. 2009. Is a new and general theory of molecular systematics emerging?  
652 *Evolution* 63:1–19. doi: 10.1111/j.1558-5646.2008.00549.x

653 Farias, I.P., Ortí, G., Sampaio, I., Schneider, H., Meyer, A., 1999. Mitochondrial DNA  
654 phylogeny of the family Cichlidae: monophyly and fast molecular evolution of  
655 the Neotropical assemblage. *J. Mol. Evol.* 48, 703–711.

656 Farias IP, Ortí G, Meyer A. 2000. Total evidence: molecules, morphology, and the  
657 phylogenetics of cichlid fishes. *J Exp Zool* 288:76–92.

658 Friedman M, Keck BP, Dornburg A, Eytan RI, Martin CH, Darrin C, Wainwright PC,  
659 Near TJ, Hulsey CD. 2013. Molecular and fossil evidence place the origin of  
660 cichlid fishes long after Gondwanan rifting. *Proc R Soc B Biol Sci* 280:20131733.  
661 doi: <http://dx.doi.org/10.1098/rspb.2013.1733>

662 Gavryushkina A, Heath TA, Ksepka DT, Stadler T, Welch D, Drummond AJ,  
663 Avryushkina ALG, Eath TRAH, Sepka DATK, Tadler TAS, Elch DAW. 2016.

664 Bayesian Total-Evidence Dating Reveals the Recent Crown Radiation of  
665 Penguins. *Syst Biol* 0:syw060. doi: 10.1093/sysbio/syw060

666 Heath TA, Huelsenbeck JP, Stadler T. 2014. The fossilized birth-death process for  
667 coherent calibration of divergence-time estimates. *Proc Natl Acad Sci*. doi:  
668 10.1073/pnas.1319091111

669 Heled J, Drummond AJ. 2010. Bayesian inference of species trees from multilocus data.  
670 *Mol Biol Evol* 27:570–80. doi: 10.1093/molbev/msp274

671 Hulsey CD, García de León FJ, Rodiles-Hernández R. 2006. Micro- and  
672 macroevolutionary decoupling of cichlid jaws: a test of Liem’s key innovation  
673 hypothesis. *Evolution* 60:2096–109.

674 Hulsey CD, García De León FJ. 2005. Cichlid jaw mechanics: Linking morphology to  
675 feeding specialization. *Funct Ecol* 19:487–494. doi: 10.1111/j.1365-  
676 2435.2005.00987.x

677 Ilves, K.L., López-Fernández, H. 2014. A targeted next-generation sequencing toolkit for  
678 exon-based cichlid phylogenomics. *Mol. Ecol. Res.* 14, 802–811.

679 Ingram T, Mahler DL. 2013. SURFACE: Detecting convergent evolution from  
680 comparative data by fitting Ornstein-Uhlenbeck models with stepwise Akaike  
681 Information Criterion. *Methods Ecol Evol* 4:416–425. doi: 10.1111/2041-  
682 210X.12034

683 Kearse, M., Moir, R., Wilson, A., Stones-Havas, S., Cheung, M., Sturrock, S., Buxton,  
684 S., Cooper, A., Markowitz, S., Duran, C., Thierer, T., Ashton, B., Mentjies, P., &  
685 Drummond, A. 2012. Geneious Basic: an integrated and extendable desktop

686 software platform for the organization and analysis of sequence data.  
687 Bioinformatics 28, 1647-1649.

688 Kocher TD. 2004. Adaptive evolution and explosive speciation: the cichlid fish model.  
689 Nat Rev Genet 5:288–298. doi: 10.1038/nrg1316

690 Kubatko LS, Degnan JH. 2007. Inconsistency of phylogenetic estimates from  
691 concatenated data under coalescence. Syst Biol 56:17–24. doi:  
692 10.1080/10635150601146041

693 Kullander, S.O., 1998. A Phylogeny and Classification of the Neotropical Cichlidae  
694 (Teleostei: Perciformes). In: Malabarba, L.R., Reis, R.E., Vari, R.P., Lucena,  
695 Z.M., Lucena, C.A.S. (Eds.), Phylogeny and classification of Neotropical fishes.  
696 EDIPUCRS, Porto Alegre, pp. 461–498.

697 Liu, L., Yu, L., Pearl, D.Kk, Edwards, S.V., 2009. Estimating species phylogenies using  
698 coalescence times among sequences. Syst. Biol. 58, 468–477.

699 Loken, C., Gruner, D., Groer, L., Peltier, R., Bunn, N., Craig, M., Henriques, T.,  
700 Dempsey, J., Yu. C.-H., Chen, Dursi, J.L., Chong, J., Northrup, S., Pinto, J., Knecht, N.,  
701 Van Zon, R., 2010. SciNet: lessons learned from building a power-efficient top-  
702 20 system and data centre. J. Phys.: Conf. Ser. 256, 012026. doi: 10.1088/1742-  
703 6596/256/1/012026.

704 López-Fernández H, Winemiller KO, Honeycutt RL. 2010. Multilocus phylogeny and  
705 rapid radiations in Neotropical cichlid fishes (Perciformes: Cichlidae: Cichlinae).  
706 Mol Phylogenet Evol 55:1070–1086. doi: 10.1016/j.ympev.2010.02.020

707 López-Fernández H, Taphorn DC, Liverpool EA. 2012. Phylogenetic diagnosis and  
708 expanded description of the genus Mazarunia Kullander,1990 (Teleostei :

709 Cichlidae ) from the upper Mazaruni River , Guyana , with description of two new  
710 species. 10:465–486.

711 López-Fernández H, Arbour JH, Winemiller KO, Honeycutt RL. 2013. Testing for  
712 ancient adaptive radiations in neotropical cichlid fishes. *Evolution* 67:1321–37.  
713 doi: 10.1111/evo.12038

714 Maddison W. 1997. Gene trees in species trees. *Syst Biol* 46:523–536.

715 Mendes F, Hahn M. 2017. Why Concatenation Fails in the Anomaly Zone. *BioRxiv*.  
716 <https://doi.org/10.1101/116509>

717 Matschiner M, Musilová Z, Barth JMI, Starostová Z, Salzburger W, Steel M, Bouckaert  
718 R (2016) Bayesian Phylogenetic Estimation of Clade Ages Supports Trans-  
719 Atlantic Dispersal of Cichlid Fishes. *Syst Biol* syw076. doi:  
720 10.1093/sysbio/syw076

721 McMahan CD, Chakrabarty P, Sparks JS, Smith WL, Davis MP. 2013. Temporal Patterns  
722 of Diversification across Global Cichlid Biodiversity (Acanthomorpha:  
723 Cichlidae). *PLoS One* 8:e71162. doi: 10.1371/journal.pone.0071162

724 McMahan CD, Matamoros WA, Piller KR, Chakrabarty P. 2015. Taxonomy and  
725 systematics of the herichthyins (Cichlidae: Tribe Heroini), with the description of  
726 eight new Middle American Genera. *Zootaxa* 3999:211–234. doi:  
727 10.11646/zootaxa.3999.2.3

728 Mirarab, S., Warnow, T. 2015. ASTRAL-II: coalescent-based species tree estimation  
729 with many hundreds of taxa and thousands of genes. *Bioinformatics* 31, i44–i52.  
730 doi: 10.1093/bioinformatics/btv234



731 Musilová Z, Říčan O, Novák J. 2009. Phylogeny of the Neotropical cichlid fish tribe  
732 Cichlasomatini (Teleostei: Cichlidae) based on morphological and molecular data,  
733 with the description of a new genus. J Zool Syst Evol Res 47:234–247. doi:  
734 10.1111/j.1439-0469.2009.00528.x

735 Říčan O, Piálek L, Dragová K, Novák J. 2016. Diversity and evolution of the Middle  
736 American cichlid fishes (Teleostei: Cichlidae) with revised classificatio. Vertebr  
737 Zool 66:1–102.

738 Ronquist F, Klopstein S, Vilhelmsen L, Schulmeister S, Murray DL, Rasnitsyn AP.  
739 2012. A total-evidence approach to dating with fossils, applied to the early  
740 radiation of the hymenoptera. Syst Biol 61:973–999. doi: 10.1093/sysbio/sys058

741 Seehausen O. 2015. Process and pattern in cichlid radiations - inferences for  
742 understanding unusually high rates of evolutionary diversification. New Phytol  
743 207:304–312. doi: 10.1111/nph.13450

744 Seo, T.K. 2008. Calculating bootstrap probabilities of phylogeny using multilocus  
745 sequence data. Mol. Biol. Evol. 25, 960–971.

746 Shaw, T.I, Ruan, Z., Glenn, T.C., Liu, L. 2013. STRAW: Species TRee Analysis Web  
747 server. Nucleic Acids Res. 41, W238–W241. doi: 10.1093/nar/gkt377

748 Slater GJ, Pennell MW. 2014. Robust regression and posterior predictive simulation  
749 increase power to detect early bursts of trait evolution. Syst Biol 63:293–308. doi:  
750 10.1093/sysbio/syt066

751 Smith L, Chakrabarty P, Sparks J. 2008. Phylogeny, taxonomy, and evolution of  
752 Neotropical cichlids (Teleostei: Cichlidae: Cichlinae). Cladistics 24:625–641.

753 Sparks JS. 2008. Phylogeny of the Cichlid Subfamily Etroplinae and Taxonomic  
754 Revision of the Malagasy Cichlid Genus *Paretroplus* (Teleostei: Cichlidae). Bull  
755 Am Museum Nat Hist 314:1. doi: 10.1206/314.1

756 Stamatakis, A. 2014. RAxML version 8: a tool for phylogenetic analysis and post-  
757 analysis of large phylogenies. Bioinformatics 30, 1312–1313.

758 Thompson AW, Betancur-R R, López-Fernández H, Ortí G. 2014. A Time-Calibrated,  
759 Multi-locus Phylogeny of Piranhas, Pacus, and Allies (Characiformes:  
760 Serrasalminidae) and a Comparison of Species Tree Methods. Mol Phylogenet Evol  
761 In review:242–257. doi: 10.1016/j.ympev.2014.06.018

762 Tonini J, Moore A, Stern D, Shcheglovitova M, Ortí G. 2015. Concatenation and Species  
763 Tree Methods Exhibit Statistically Indistinguishable Accuracy under a Range of  
764 Simulated Conditions. 1–15. doi:  
765 10.1371/currents.tol.34260cc27551a527b124ec5f6334b6be.Abstract

766 Wagner CE, Harmon LJ, Seehausen O. 2012. Ecological opportunity and sexual selection  
767 together predict adaptive radiation. Nature 487:366–369. doi:  
768 10.1038/nature11144

769 Weadick CJ, Loew ER, Rodd FH, Chang BSW. 2012. Visual pigment molecular  
770 evolution in the Trinidadian pike cichlid (*Crenicichla frenata*): a less colorful  
771 world for neotropical cichlids? Mol Biol Evol 29:3045–60. doi:  
772 10.1093/molbev/mss115

773 Willis SC, Farias IP, Ortí G. 2013. Testing mitochondrial capture and deep coalescence  
774 in Amazonian cichlid fishes (Cichlidae: Cichla). Evolution 68:256–68. doi:  
775 10.1111/evo.12230

776 Willis SC. 2017. One species or four? Yes!...and, no. Or, arbitrary assignment of lineages  
 777 to species obscures the diversification processes of Neotropical fishes. PLoS One  
 778 12:e0172349. doi: 10.1371/journal.pone.0172349

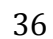

780 Figure 1. Species tree generated with ASTRAL-II for 415 loci comprising 471,448 bp.  
781 Colored clades depict formally recognized Neotropical cichlid tribes Heroini (Green),  
782 Cichlasomatini (Orange), Geophagini (Blue), Chaetobranchini (Magenta), Astronotini  
783 (Red), Retroculini (Brown), and Cichlini (Purple). See text for further discussion of  
784 relationships among and within tribes. Node bootstrap support is indicated when  
785 pertinent; nodes without labels received 100% support in this analysis. Nodes labeled in  
786 red received <75% bootstrap support. Nodes marked with an asterisk (\*) represent  
787 weakly supported intergeneric relationships with incongruent resolution among two  
788 different species-tree and one concatenated phylogenetic analyses. See Figure 2 and  
789 Discussion for further analyses of these results. Complete topologies not shown here are  
790 provided in Appendices L and M along with node support.

### A. Centra American Heroini

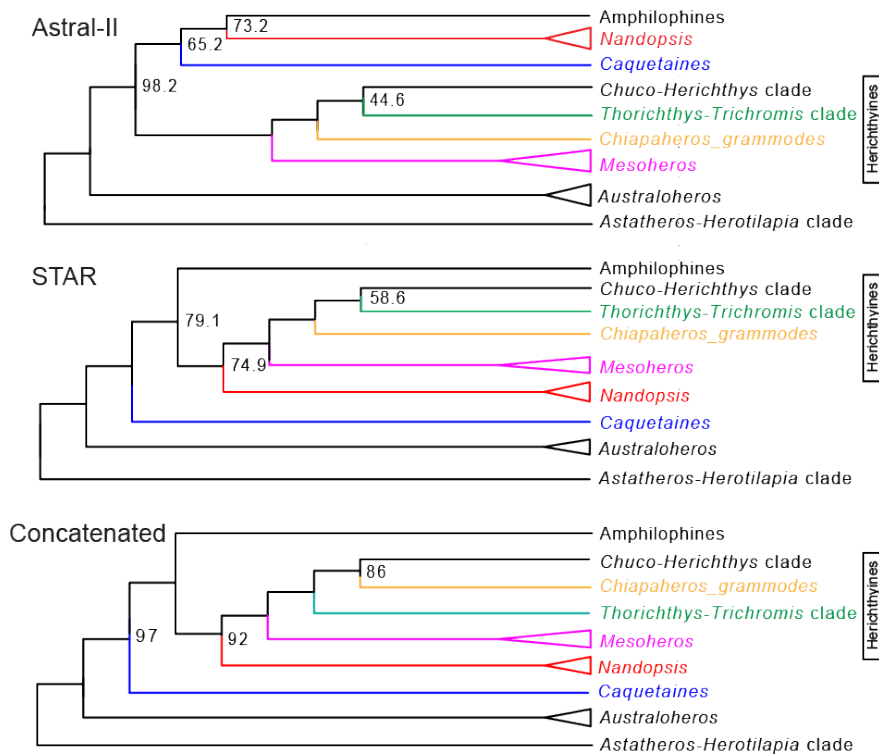

### B. Geopgagini: Geophagus-Gymnogeophagus clade

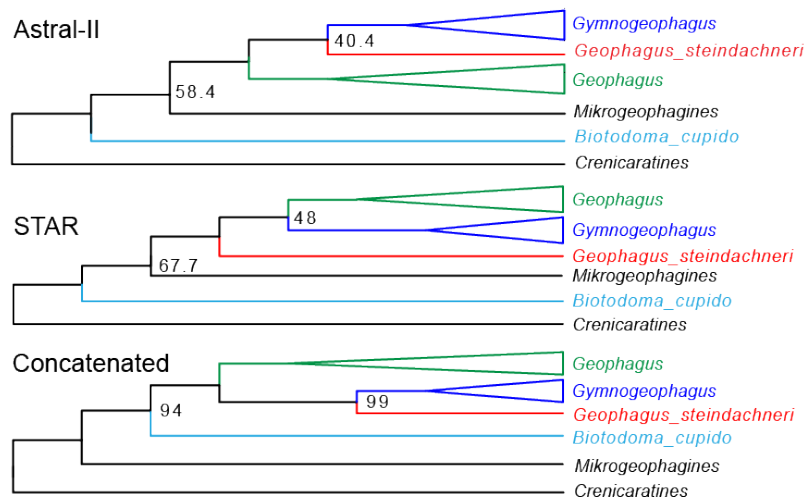

### C. Cichlasomatini: Laetacara-Acaronia

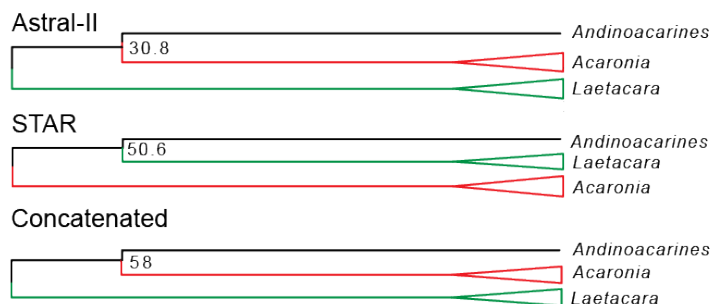

792 Figure 2. Conflicting results among analyses. Each panel depicts the alternative  
 793 topological arrangements found in the clades highlighted with asterisks in Fig. 1. Colors  
 794 are meant to represent lineages within each panel and not to be used as comparison  
 795 among clades in different panels. Numbers by nodes represent bootstrap support in each  
 796 case; nodes without numbers received 100% bootstrap support in their respective  
 797 analyses. See Fig. 1 for the ASTRAL-II species tree and Appendices L and M to see the  
 798 concatenated and STAR topologies.  
 799
